# Supplementary material
Source: PubMed Central journal article supplement (PMC5511786)
Supplement: NIHMS843058-supplement-Supp_Info4.pdf [file NIHMS843058-supplement-Supp_Info4.pdf]

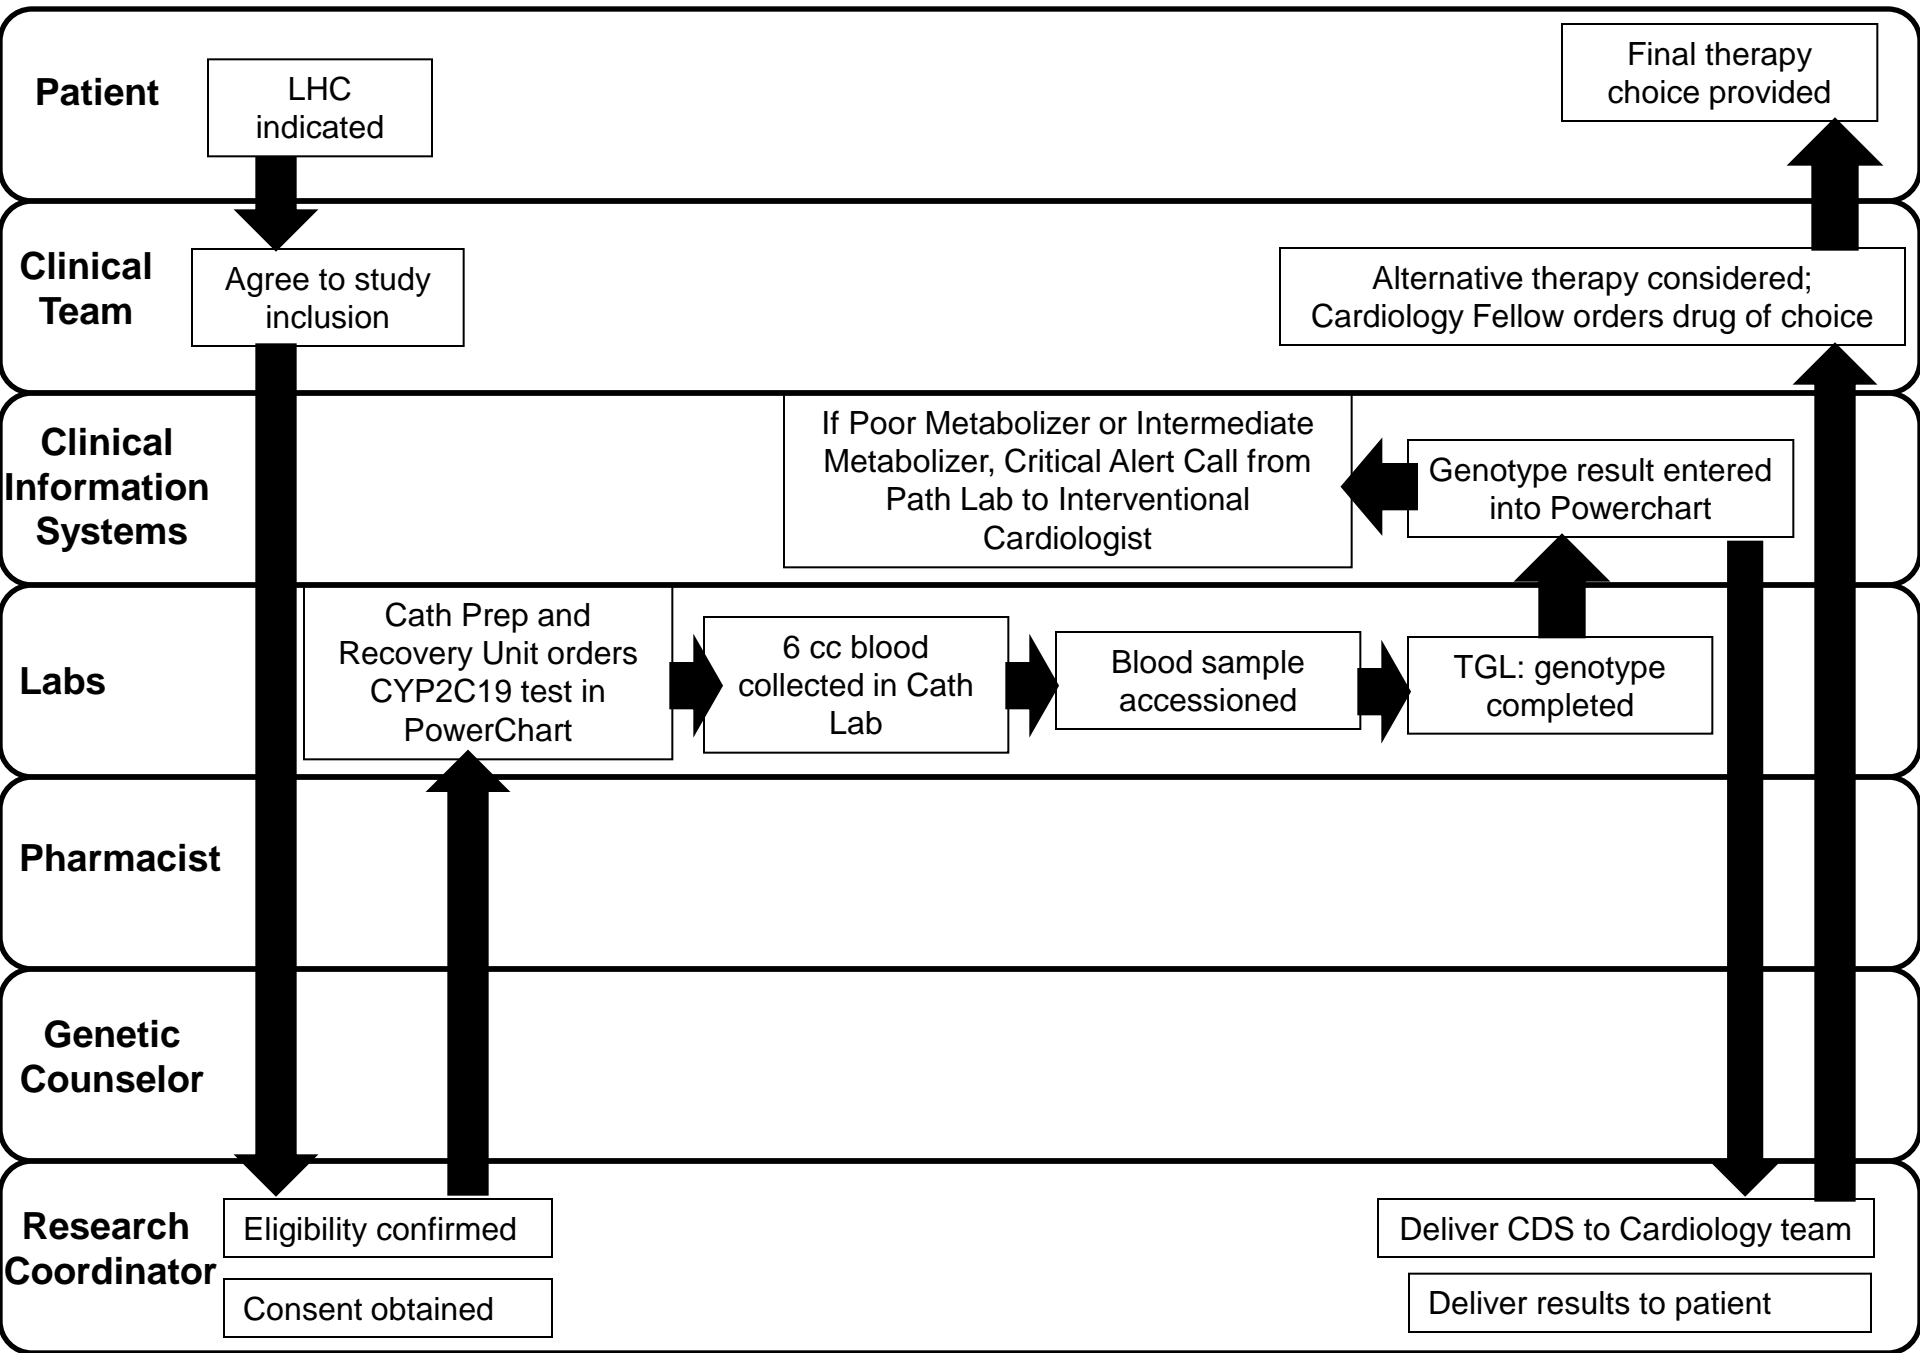

**SITE:** Ohio State University **GENE/DRUG:** CYP2C19/clopidogrel **TYPE:** Research

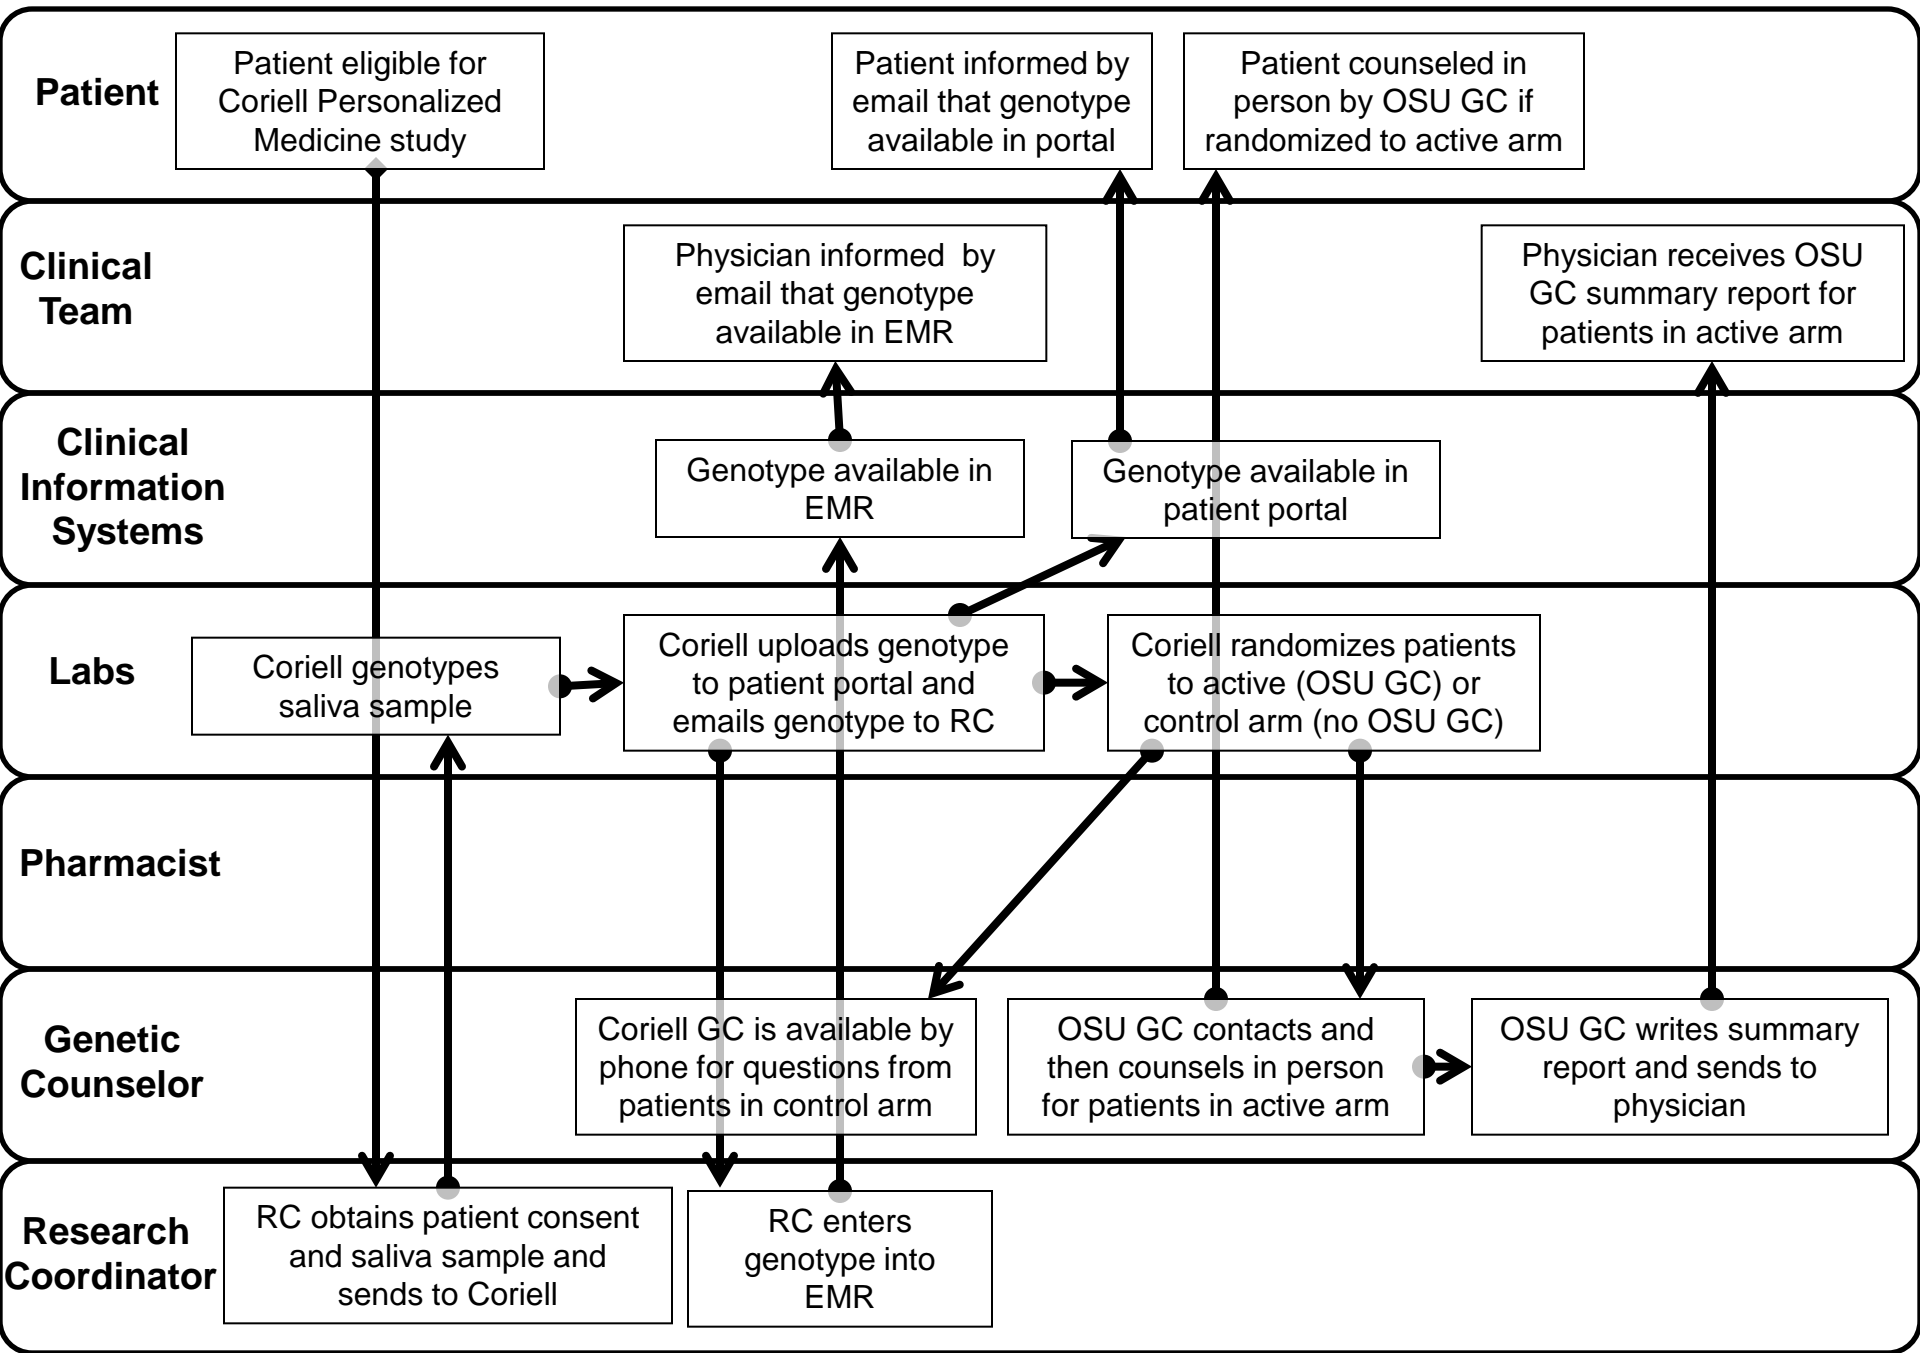

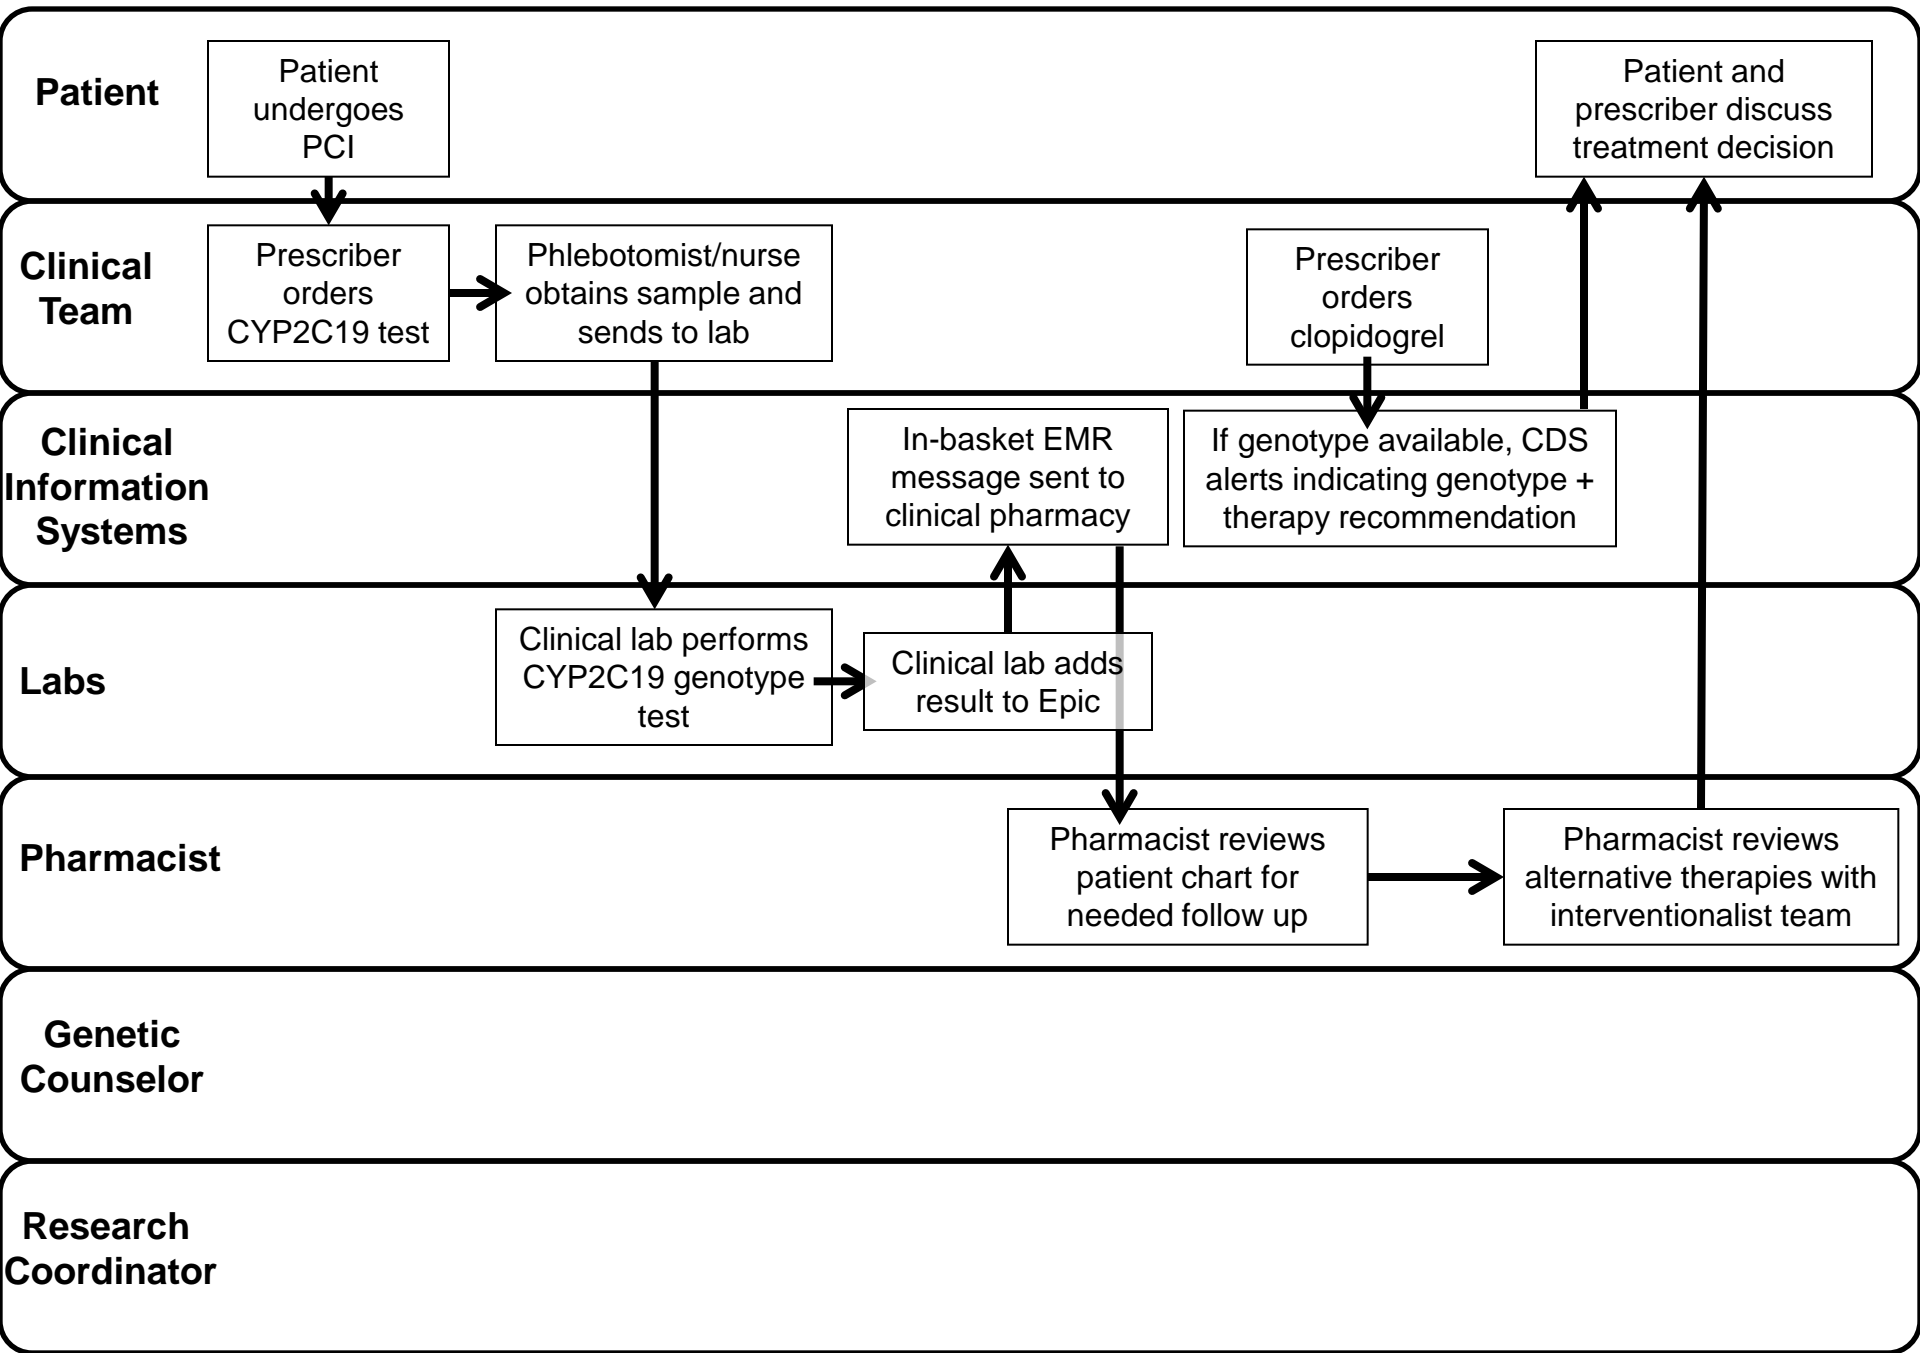

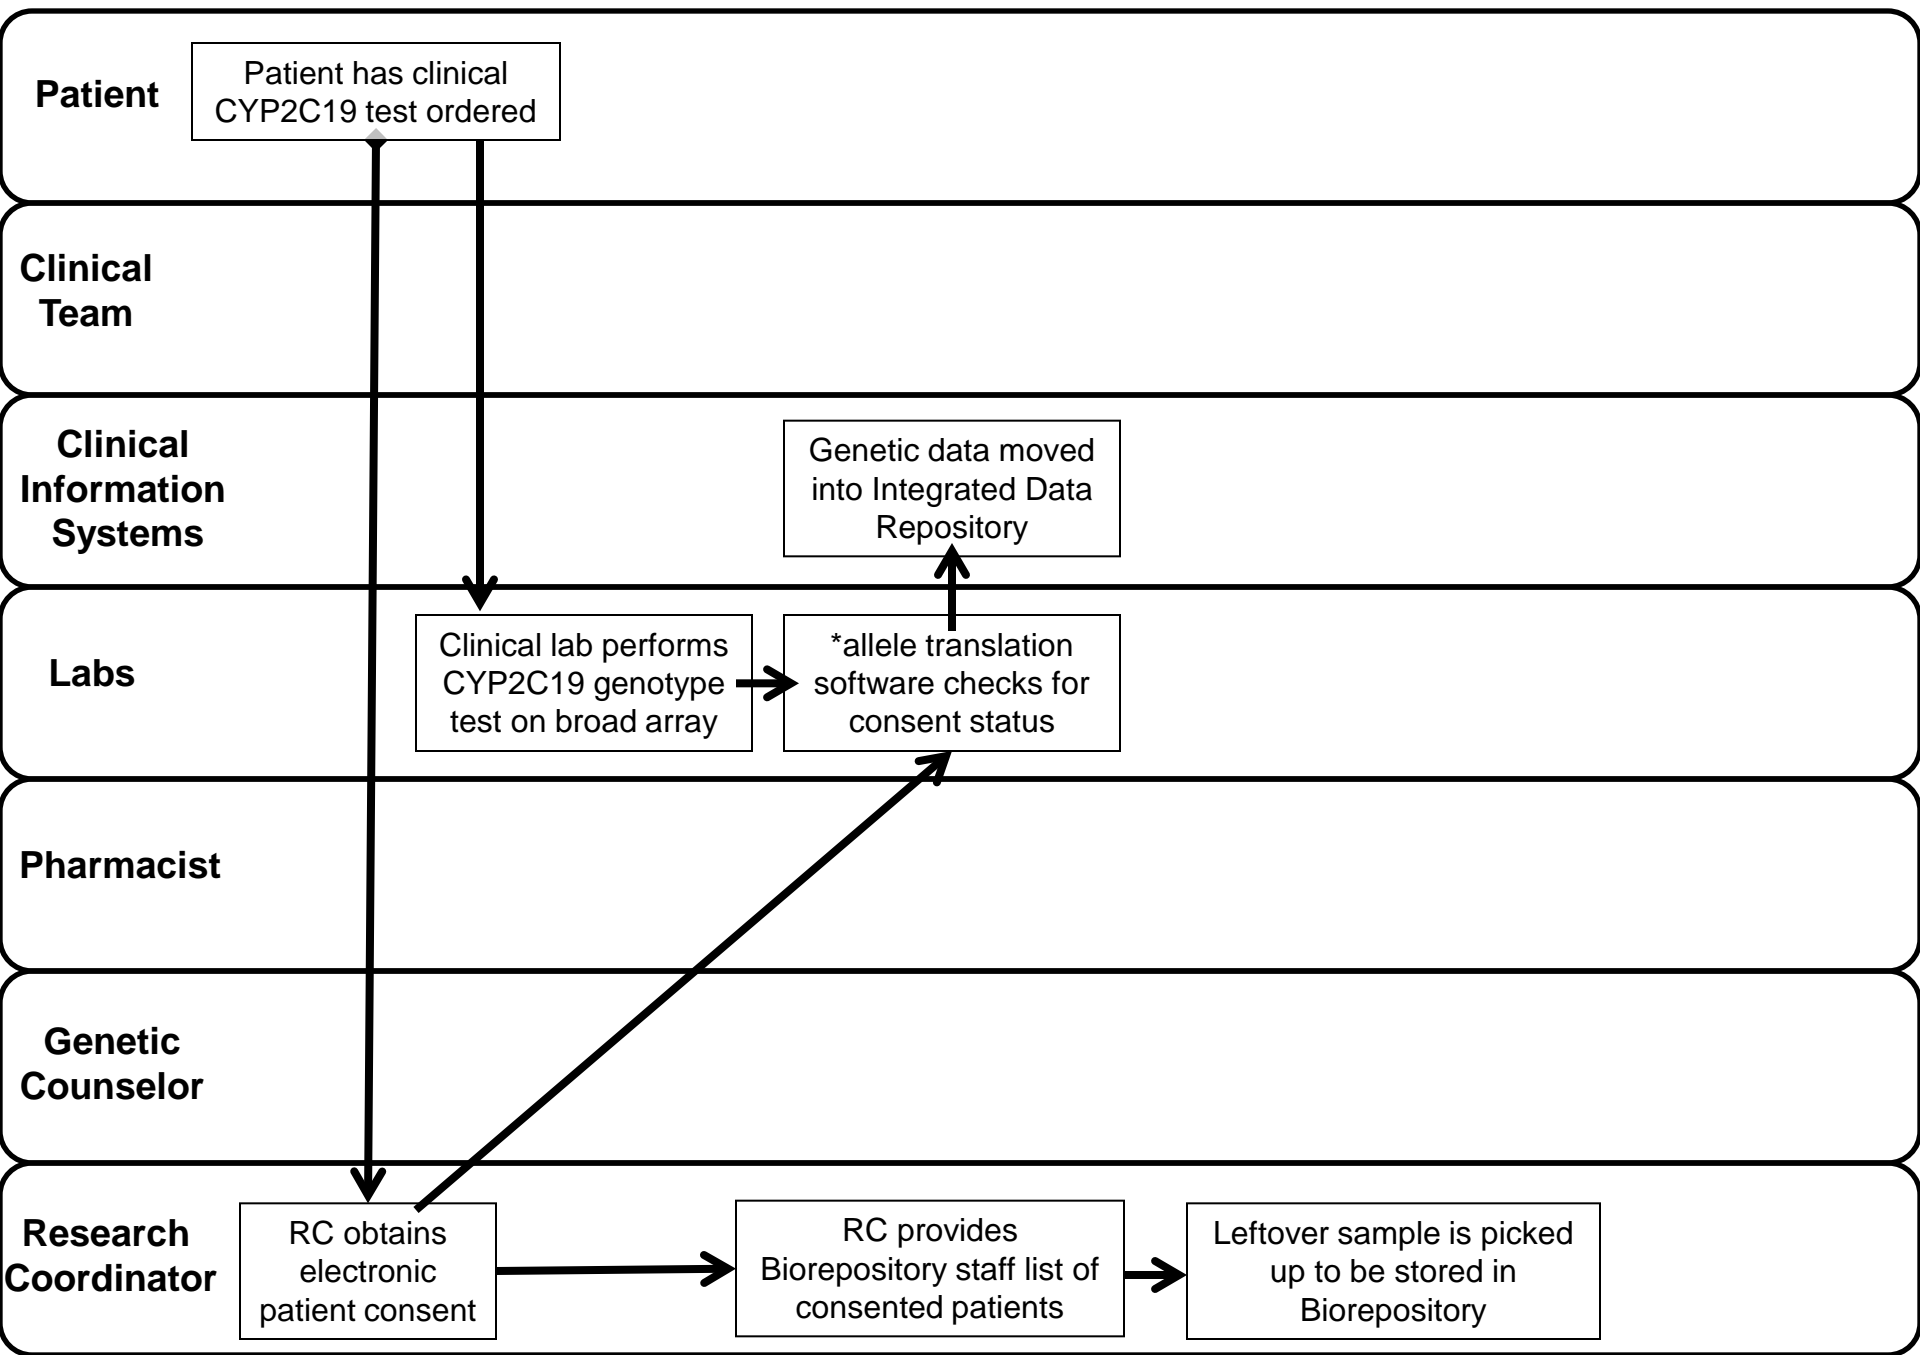

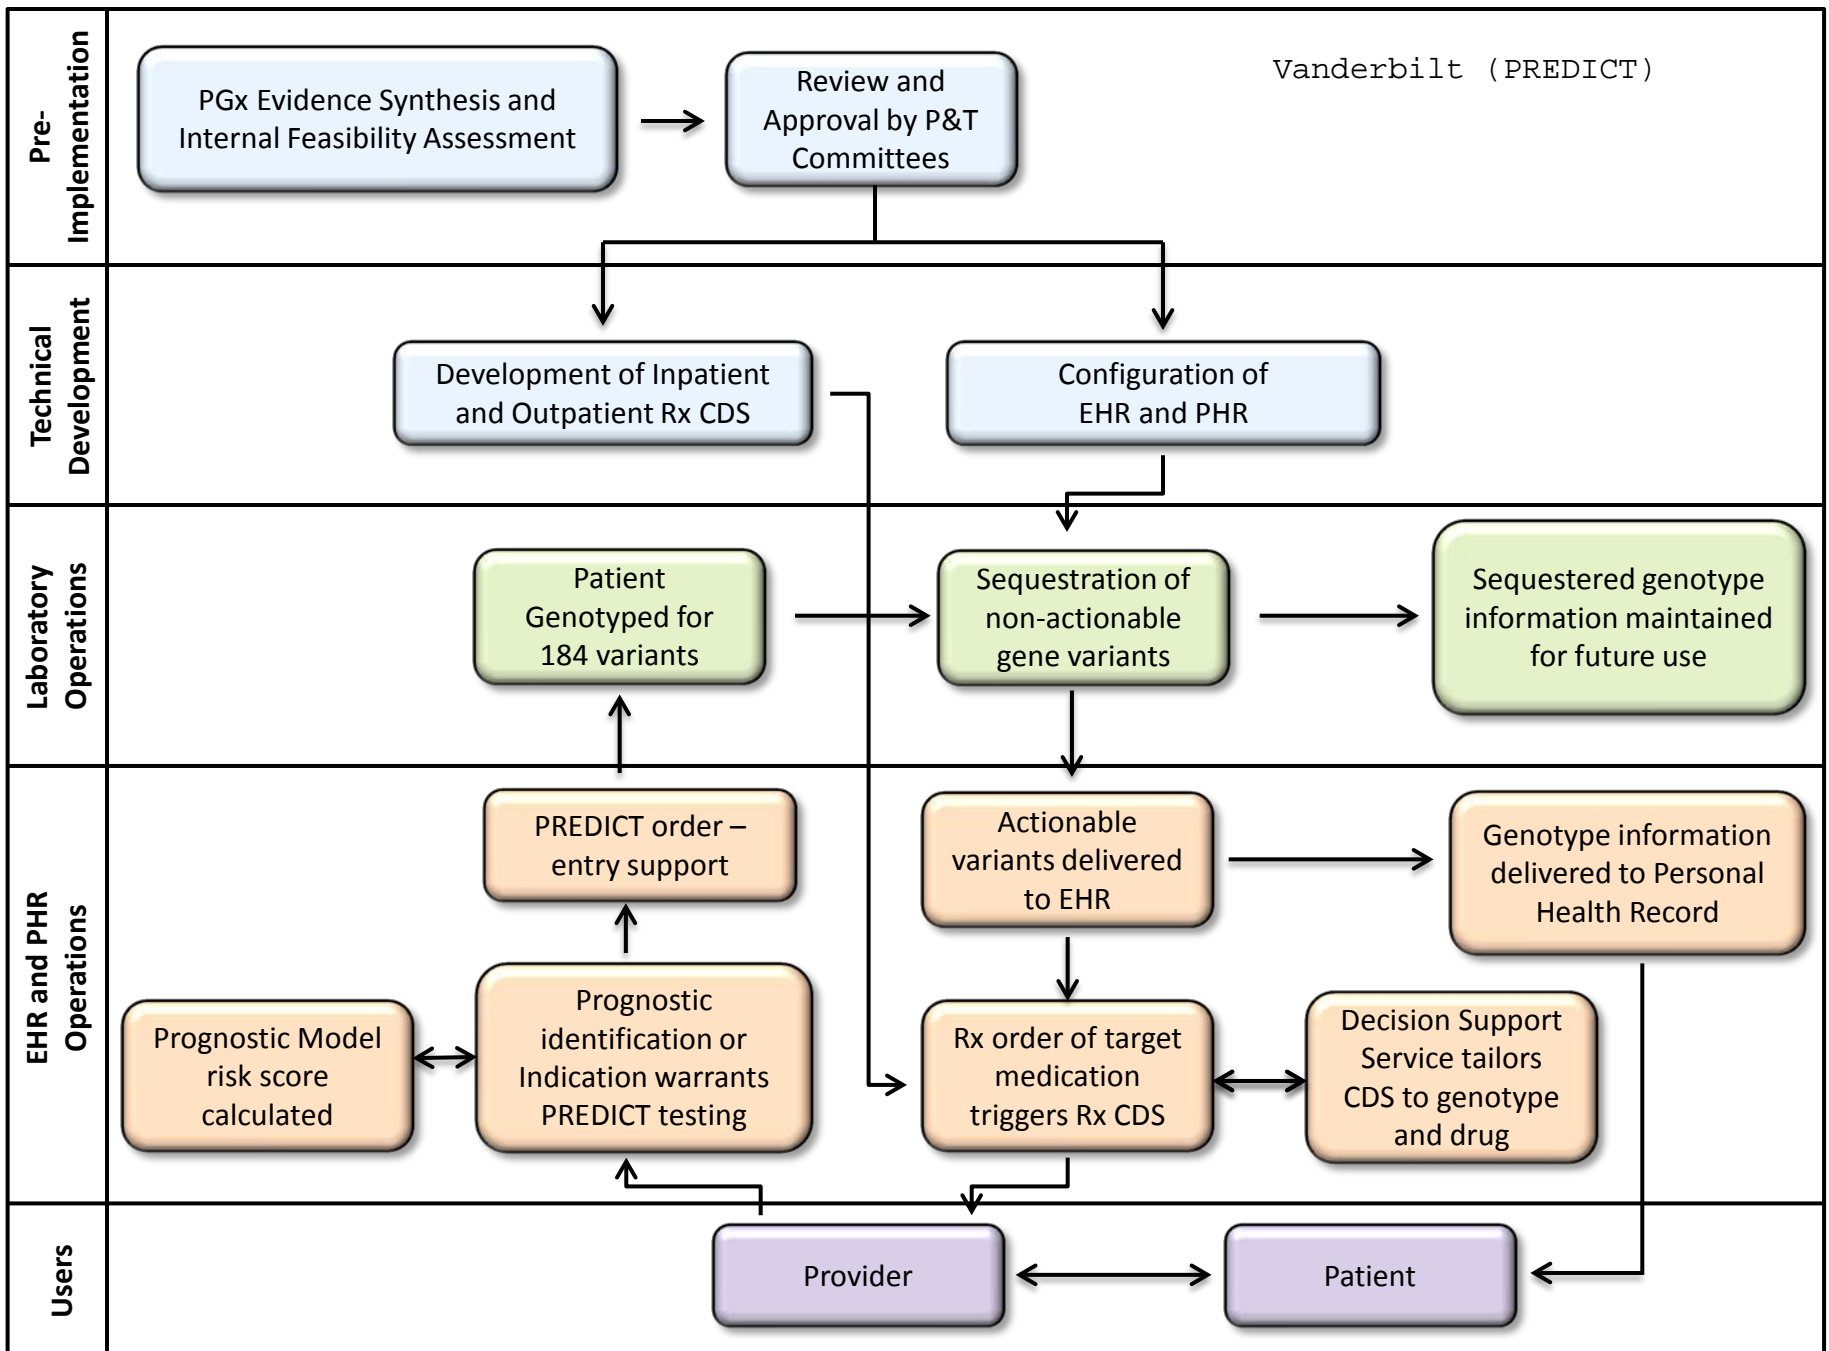

# PREDICT Result Reporting Architecture

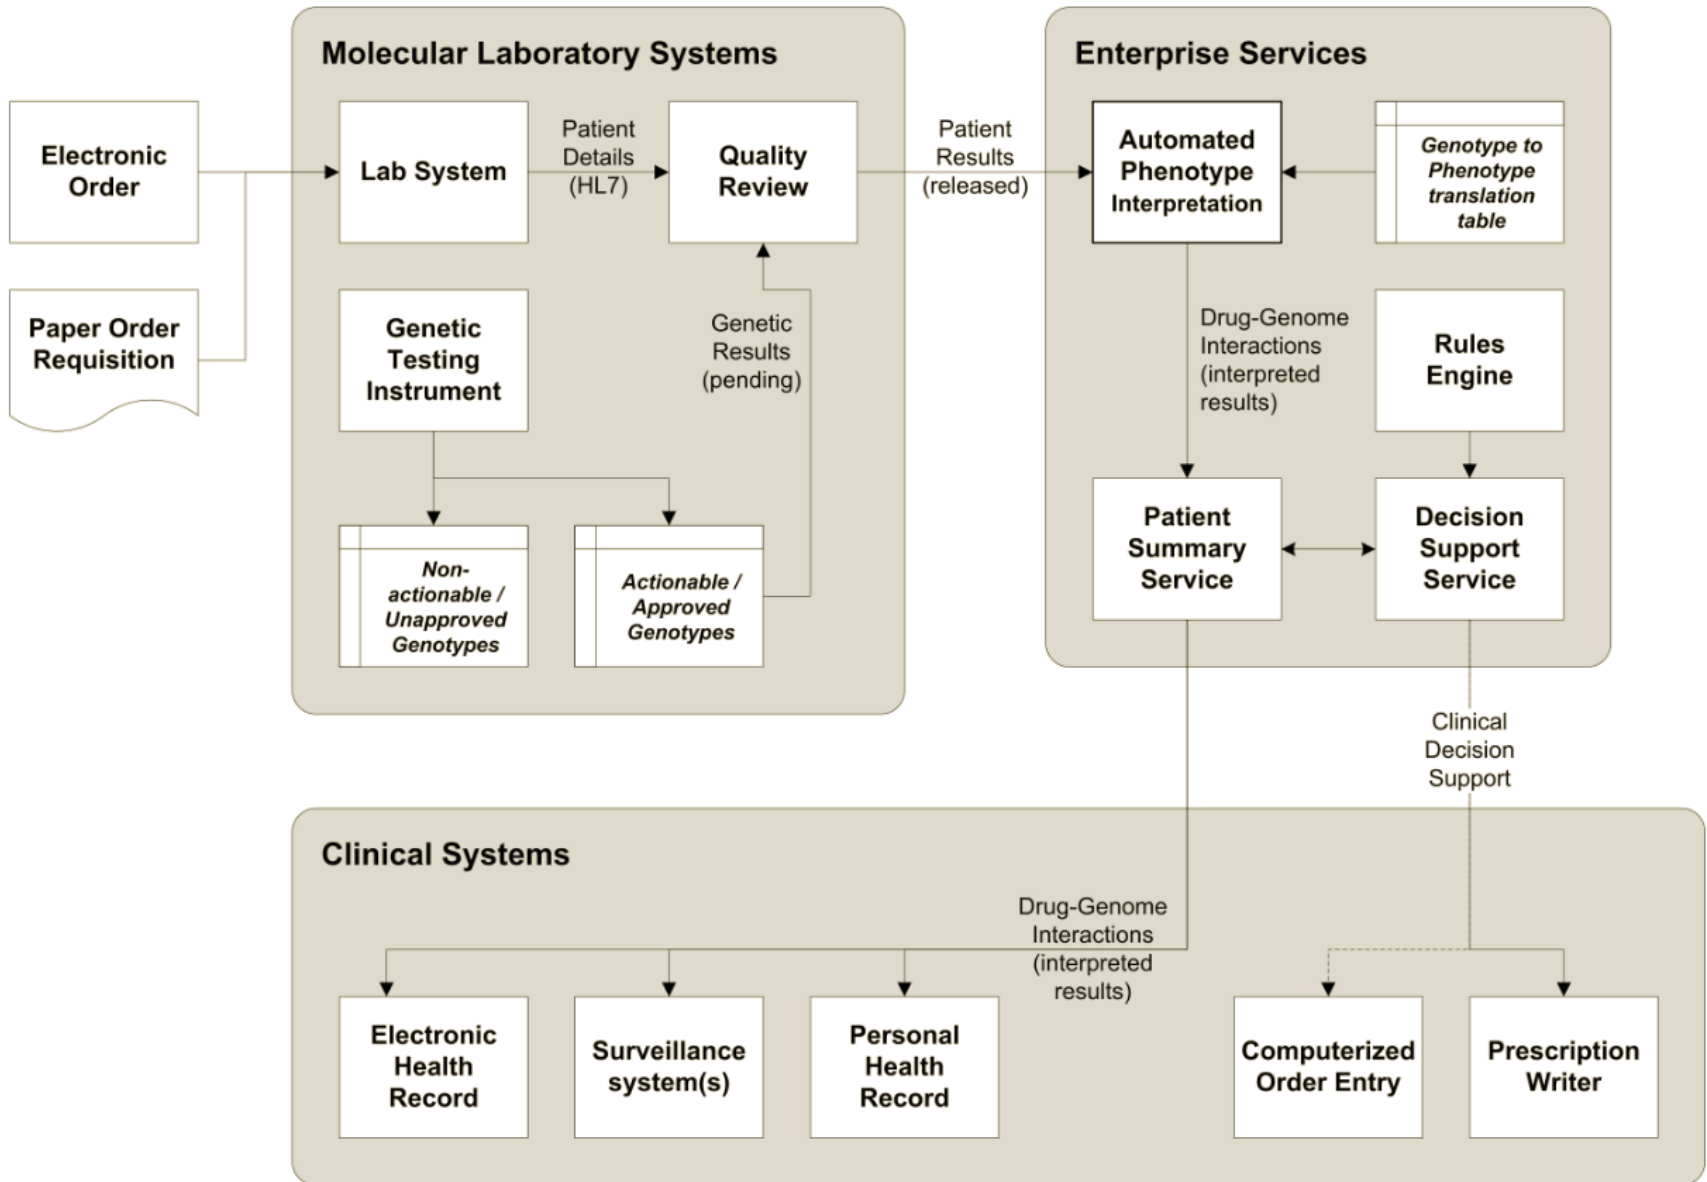

## All PGen Results Interpreted

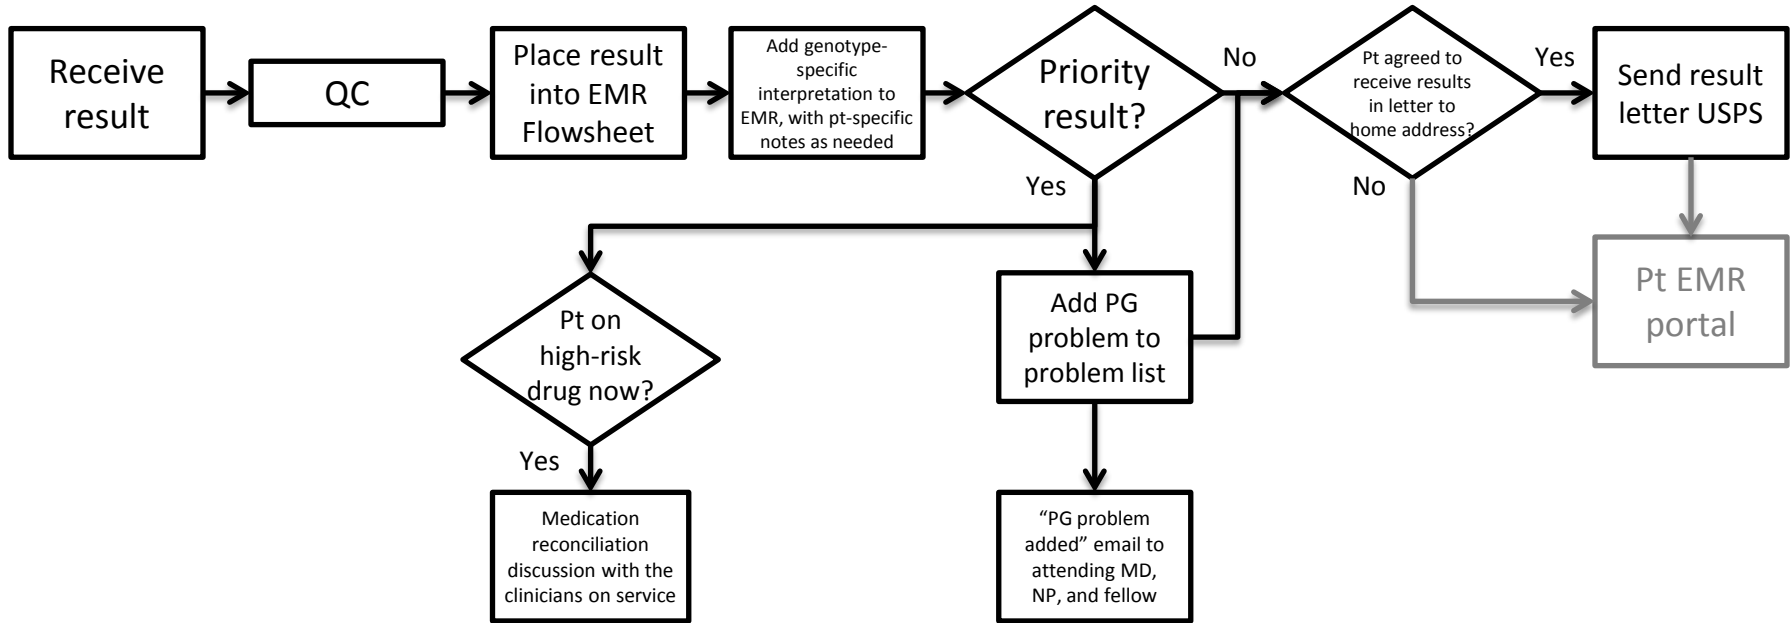

## Pre-test: drug order attempt, no genetic tests; general case

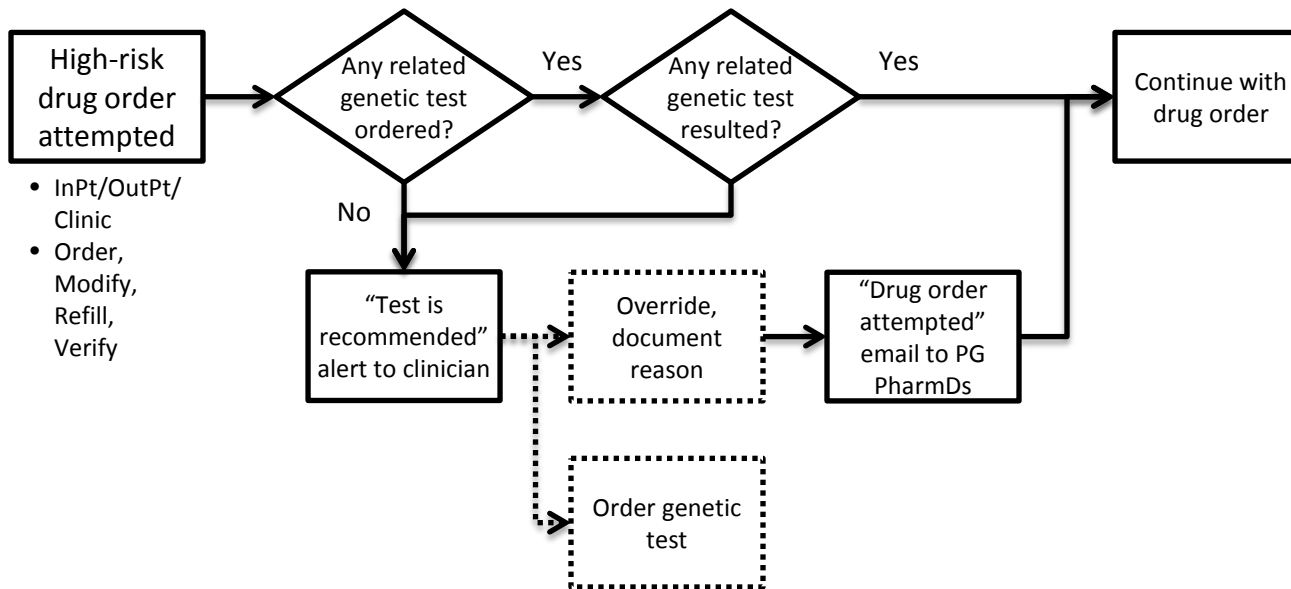

## Post-test: drug order attempt, genetic results available; general case

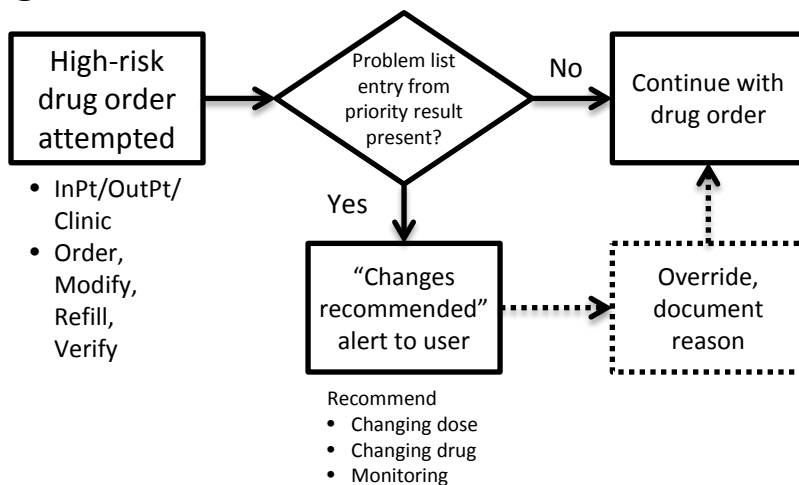

### Advertised lines of support information

- Contact PG PharmD; phone, email
- [www.stjude.org/pg4kds](http://www.stjude.org/pg4kds);
- [www.pharmgkb.org](http://www.pharmgkb.org)
- PG Formulary (linked from hospital formulary)
- Contact PK research nurses; phone, email
